# Supplementary material for: Long-term adaptation of Escherichia coli to methanogenic co-culture enhanced succinate production from crude glycerol
Source: PubMed Central journal article supplement (PMC5762792; doi:10.1007/s10295-017-1994-0), 2017-12-12
Supplement: 10295_2017_1994_MOESM1_ESM.pdf [file 10295_2017_1994_MOESM1_ESM.pdf]

**Long-term adaptation of *Escherichia coli* to methanogenic co-culture enhanced succinate production from crude glycerol**

**<Journal of Industrial Microbiology and Biotechnology>**

Nam Yeun Kim<sup>1</sup>, Su Nyung Kim<sup>2</sup>, Ok Bin Kim\*<sup>1,2</sup>

<sup>1</sup>Department of Life Science and <sup>2</sup>Interdisciplinary Program of EcoCreative, Ewha Womans University, 52, Ewhayeodae-gil, Seodaemun-gu, Seoul 03760, Republic of Korea

\*Correspondence to: Ok Bin Kim

E-mail: kimokbin@ewha.ac.kr

Figure S1. Predicted metabolic pathway for the co-cultivation of *E. coli* and *M. formicicum*. Black, the metabolic pathway in *E. coli*; red, the metabolic pathway in *M. formicicum*. Abbreviations used: Glyc, glycerol; GlpF, glycerol facilitator; GlpK, glycerol kinase; Glyc-3p, glycerol 3-phosphate; GlpA, B, C, glycerol 3-phosphate dehydrogenase A, B, C; MQH<sub>2</sub>, reduced menaquinone; DHAP, dihydroxyacetone phosphate; PEP, phosphoenolpyruvate; Ppc, phosphoenolpyruvate carboxylase; OAA, oxaloacetate; Mdh, malate dehydrogenase; Mal, malate; Fum, fumarase; FrdA, B, C, D, fumarate reductase A, B, C, D; Suc, succinate; Pyr, pyruvate; LdhA, lactate dehydrogenase; Lac, lactate; PflB, formate acetyltransferase; Ac-CoA, acetyl-CoA; AdhE, aldehyde-alcohol dehydrogenase; EtOH, ethanol; Pta, phosphate acetyltransferase; AckA, acetate kinase; For, formate; Ace, acetate; FocA, FdhC, formate transporter; F<sub>420</sub>H<sub>2</sub>, reduced coenzyme F<sub>420</sub>; MF, methanofuran; H<sub>4</sub>MP, tetrahydromethanopterin; CoM, Coenzyme M; CoB, Coenzyme B.

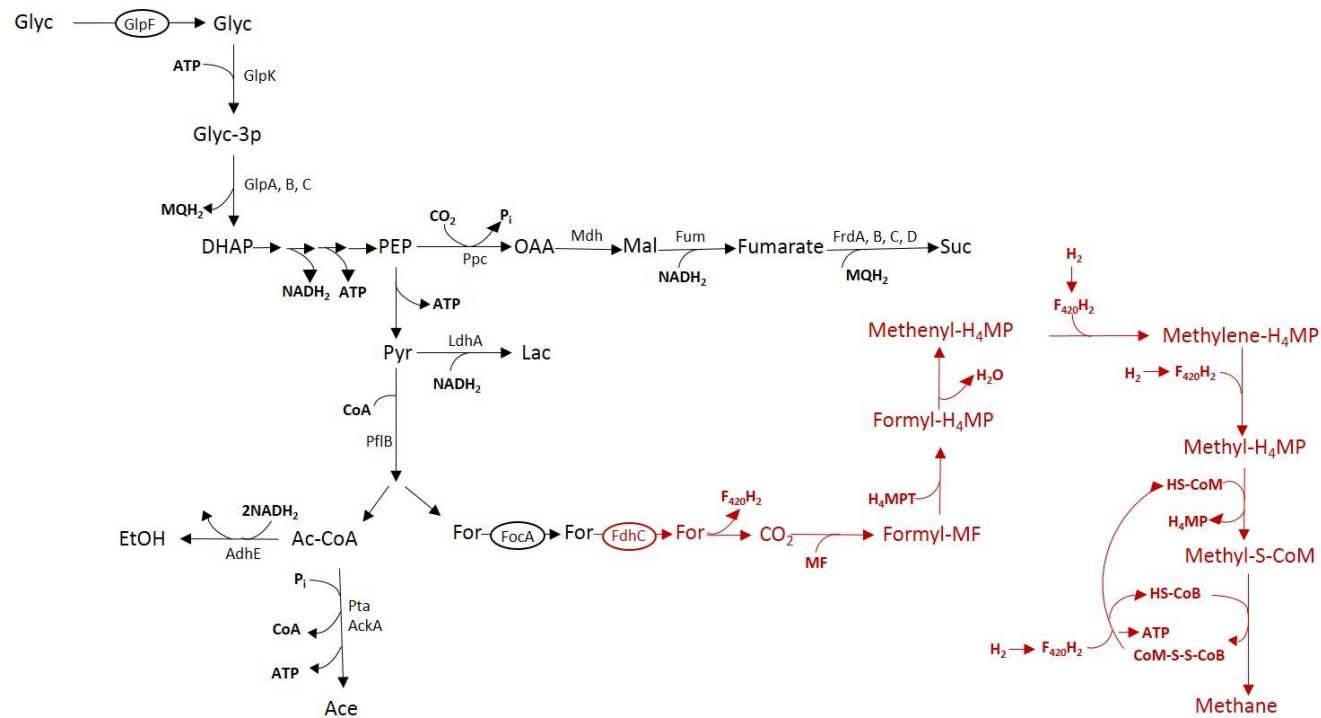

Table S1. Composition of crude glycerol

|            |         |
|------------|---------|
| Purity, %  | 80min   |
| Moisture,% | 15 max  |
| Ash, %     | 5 max   |
| MONG, %    | 1.5 max |
| pH         | 4.5-6.0 |

Table S2. Glycerol fermentation in single- or co-culture of *E. coli* with *M. formicicum*. Product analysis and cell growth were determined after 7 d of fermentation.

| <i>E. coli</i><br>Strains | Culture<br>condition | Consumption<br>(mM) |           | Production<br>(mM) |         |           | Cell number (T <sub>0</sub> )            | Cell number (T <sub>7</sub> )            | Cell number (T <sub>0</sub> )            | Cell number (T <sub>7</sub> )            |
|---------------------------|----------------------|---------------------|-----------|--------------------|---------|-----------|------------------------------------------|------------------------------------------|------------------------------------------|------------------------------------------|
|                           |                      | Glycerol            | Succinate | Formate            | Acetate | Ethanol   | (mL <sup>-1</sup> )<br><i>E. coli</i>    | (mL <sup>-1</sup> )<br><i>E. coli</i>    | (mL <sup>-1</sup> )<br>MF                | (mL <sup>-1</sup> )<br>MF                |
| wild<br>type              | Single               | 4.6±1.6             | 1.0±0.1   | 10.7±3.5           | 1.7±0.9 | 9.6±2.0   | 5.0x10 <sup>8</sup> ±1.6x10 <sup>8</sup> | 3.4x10 <sup>8</sup> ±0.4x10 <sup>8</sup> | ND                                       | ND                                       |
|                           | Co-culture           | 53±12.8             | 8.0±0.7   | 0                  | 7.3±1.0 | 47.2±16.1 | 5.0x10 <sup>8</sup> ±2.1x10 <sup>8</sup> | 1.1x10 <sup>9</sup> ±0.2x10 <sup>9</sup> | 4.7x10 <sup>7</sup> ±2.1x10 <sup>7</sup> | 2.1x10 <sup>8</sup> ±1.2x10 <sup>8</sup> |
| ΔpflB                     | Single               | 0.7±0.6             | 0.8±0.1   | 0                  | 0.6±0.1 | 0         | 3.9x10 <sup>8</sup> ±0.9x10 <sup>8</sup> | 1.6x10 <sup>8</sup> ±0.5x10 <sup>8</sup> | ND                                       | ND                                       |
|                           | Co-culture           | 1.9±2.3             | 1.8±0.2   | 0                  | 0.2±0.4 | 6.4±0.6   | 4.5x10 <sup>8</sup> ±1.6x10 <sup>8</sup> | 2.4x10 <sup>8</sup> ±0.2x10 <sup>8</sup> | 3.8x10 <sup>7</sup> ±0.9x10 <sup>7</sup> | 6.7x10 <sup>7</sup> ±2.1x10 <sup>7</sup> |
| ΔadhE                     | Single               | 0.8±0.2             | 0.4±0.1   | 2.6±0.6            | 1.8±0.5 | 0         | 3.9x10 <sup>8</sup> ±0.6x10 <sup>8</sup> | 6.8x10 <sup>7</sup> ±3.6x10 <sup>7</sup> | ND                                       | ND                                       |
|                           | Co-culture           | 1.0±1.1             | 0.5±0.2   | 0                  | 2.3±0.6 | 0         | 3.5x10 <sup>8</sup> ±1.2x10 <sup>8</sup> | 1.4x10 <sup>8</sup> ±0.6x10 <sup>8</sup> | 3.2x10 <sup>7</sup> ±0                   | 5.6x10 <sup>7</sup> ±2.8x10 <sup>7</sup> |
| Δpta                      | Single               | 5.7±0.7             | 1.3±0.2   | 8.5±1.8            | 0       | 12.5±2.1  | 4.0x10 <sup>8</sup> ±1.2x10 <sup>8</sup> | 2.0x10 <sup>8</sup> ±0.7x10 <sup>8</sup> | ND                                       | ND                                       |
|                           | Co-culture           | 18.7±5.1            | 3.4±0.4   | 0                  | 2.4±1.2 | 23.0±6.7  | 1.8x10 <sup>8</sup> ±0.9x10 <sup>8</sup> | 4.8x10 <sup>8</sup> ±3.2x10 <sup>8</sup> | 2.5x10 <sup>7</sup> ±1.1x10 <sup>7</sup> | 1.3x10 <sup>8</sup> ±0.7x10 <sup>8</sup> |
| ΔackA                     | Single               | 7.8±1.2             | 0.8±0     | 13.3±1.8           | 1.6±0.4 | 13.3±1.9  | 2.0x10 <sup>8</sup> ±0.9x10 <sup>8</sup> | 2.9x10 <sup>8</sup> ±1.3x10 <sup>8</sup> | ND                                       | ND                                       |
|                           | Co-culture           | 28.5±2.3            | 1.9±0.1   | 0                  | 5.2±0.9 | 35.8±3.6  | 2.3x10 <sup>8</sup> ±0.8x10 <sup>8</sup> | 7.3x10 <sup>8</sup> ±1.1x10 <sup>8</sup> | 2.8x10 <sup>7</sup> ±1.7x10 <sup>7</sup> | 1.6x10 <sup>8</sup> ±0.2x10 <sup>8</sup> |

Values report means ± standard deviations for 3 replicates.

Wild type MG1655; ΔpflB, *pflB* knockout MG1655; ΔadhE, *adhE* knockout MG1655; Δpta, *pta* knockout MG1655; ΔackA, *ackA* knockout MG1655

Table S3. Fermentative characteristics of adapted *E. coli* on crude glycerol. *E. coli* was adapted to *M. formicicum* via 39 successive rounds of cultivation on glycerol. The adapted (39<sup>th</sup>-round) or non-adapted (1<sup>st</sup>-round) *E. coli* was cultivated for 96 h on crude glycerol with *M. formicicum* or DMSO. Succinate production (A), crude glycerol consumption (B), and growth by the co-cultivation of *M. formicicum* with *E. coli* (C).

(A) Succinate production (mM)

| Time (h) | 39 <sup>th</sup> <i>E. coli</i> | 1 <sup>st</sup> <i>E. coli</i> | 39 <sup>th</sup> <i>E. coli</i> | 1 <sup>st</sup> <i>E. coli</i> | 39 <sup>th</sup> <i>E. coli</i> | 1 <sup>st</sup> <i>E. coli</i> |
|----------|---------------------------------|--------------------------------|---------------------------------|--------------------------------|---------------------------------|--------------------------------|
|          | <i>M. formicicum</i>            | <i>M. formicicum</i>           | DMSO                            | DMSO                           | <i>M. formicicum</i>            | <i>M. formicicum</i>           |
|          |                                 |                                |                                 |                                | DMSO                            | DMSO                           |
| 0        | 0                               | 0                              | 0                               | 0                              | 0                               | 0                              |
| 24       | 3.9±0.1                         | 2.9±0.1                        | 4.4±0.1                         | 2.7±0.2                        | 4.9±0                           | 3.5±0.3                        |
| 48       | 8.3±0.2                         | 4.7±0.1                        | 8.7±0.2                         | 5.1±0.1                        | 10.2±0.1                        | 6.6±0.4                        |
| 72       | 15.8±1.1                        | 7.8±0.5                        | 12.2±0.1                        | 6.4±0.1                        | 16.2±0.2                        | 10.7±0.4                       |
| 96       | 19.9±1.4                        | 9.7±0.2                        | 14.0±0.2                        | 7.2±0                          | 19.8±0.5                        | 12.6±0.4                       |

(B) Crude-glycerin consumption (mM)

| Time (h) | 39 <sup>th</sup> <i>E. coli</i> | 1 <sup>st</sup> <i>E. coli</i> | 39 <sup>th</sup> <i>E. coli</i> | 1 <sup>st</sup> <i>E. coli</i> | 39 <sup>th</sup> <i>E. coli</i> | 1 <sup>st</sup> <i>E. coli</i> |
|----------|---------------------------------|--------------------------------|---------------------------------|--------------------------------|---------------------------------|--------------------------------|
|          | <i>M. formicicum</i>            | <i>M. formicicum</i>           | DMSO                            | DMSO                           | <i>M. formicicum</i>            | <i>M. formicicum</i>           |
|          |                                 |                                |                                 |                                | DMSO                            | DMSO                           |
| 0        | 0                               | 0                              | 0                               | 0                              | 0                               | 0                              |
| 24       | 7.4±0.2                         | 9.7±2.0                        | 7.4±0.6                         | 8.3±0.6                        | 17.4±1.1                        | 17.9±4.6                       |

|    |          |          |          |          |          |          |
|----|----------|----------|----------|----------|----------|----------|
| 48 | 37.1±1.8 | 32.0±2.8 | 23.1±2.7 | 25.6±0.8 | 40.4±1.4 | 45.2±1.8 |
| 72 | 73.9±0.9 | 65.6±0.4 | 40.5±1.3 | 45.3±3.2 | 70.0±2.2 | 72.1±1.0 |
| 96 | 83.8±0.8 | 82.0±1.0 | 46.3±1.1 | 54.1±1.1 | 78.5±1.2 | 81.0±1.4 |

(C) Optical density (OD<sub>600</sub>) and cell numbers (mL<sup>-1</sup>)

| Time (h) | 39 <sup>th</sup> <i>E. coli</i> |                      | 1 <sup>st</sup> <i>E. coli</i> |           | 39 <sup>th</sup> <i>E. coli</i> |                      | 1 <sup>st</sup> <i>E. coli</i> |      |
|----------|---------------------------------|----------------------|--------------------------------|-----------|---------------------------------|----------------------|--------------------------------|------|
|          | <i>M. formicicum</i>            | <i>M. formicicum</i> | DMSO                           | DMSO      | <i>M. formicicum</i>            | <i>M. formicicum</i> | DMSO                           | DMSO |
| 0        | 0.36±0.01                       | 0.37±0.01            | 0.27±0.01                      | 0.28±0.01 | 0.35±0.02                       | 0.36±0.02            |                                |      |
| 24       | 0.67±0.02                       | 0.73±0.02            | 0.77±0.02                      | 0.87±0.01 | 0.85±0.01                       | 0.98±0.03            |                                |      |
| 48       | 1.08±0.01                       | 1.06±0.01            | 0.98±0.02                      | 1.09±0.01 | 1.16±0.02                       | 1.28±0.02            |                                |      |
| 72       | 1.32±0.04                       | 1.25±0.02            | 1.01±0.01                      | 1.12±0.01 | 1.31±0.02                       | 1.39±0.02            |                                |      |
| 96       | 1.33±0.03                       | 1.31±0.02            | 1.01±0.01                      | 1.10±0    | 1.32±0.02                       | 1.41±0.03            |                                |      |

  

| Time (h) | 39 <sup>th</sup> <i>E. coli</i> |                                          | 1 <sup>st</sup> <i>E. coli</i>           |                                          | 39 <sup>th</sup> <i>E. coli</i>          |                                          | 1 <sup>st</sup> <i>E. coli</i>           |      |
|----------|---------------------------------|------------------------------------------|------------------------------------------|------------------------------------------|------------------------------------------|------------------------------------------|------------------------------------------|------|
|          | <i>M. formicicum</i>            | <i>M. formicicum</i>                     | DMSO                                     | DMSO                                     | <i>M. formicicum</i>                     | <i>M. formicicum</i>                     | DMSO                                     | DMSO |
| 0        | <i>E. coli</i>                  | 2.8x10 <sup>8</sup> ±7.2x10 <sup>7</sup> | 3.5x10 <sup>8</sup> ±1.5x10 <sup>7</sup> | 1.3x10 <sup>8</sup> ±6.8x10 <sup>7</sup> | 2.2x10 <sup>8</sup> ±1.2x10 <sup>7</sup> | 2.2x10 <sup>8</sup> ±4.2x10 <sup>7</sup> | 2.9x10 <sup>8</sup> ±5.5x10 <sup>7</sup> |      |
|          | MF                              | 4.3x10 <sup>7</sup> ±1.3x10 <sup>7</sup> | 4.4x10 <sup>7</sup> ±1.0x10 <sup>7</sup> | 0                                        | 0                                        | 3.5x10 <sup>7</sup> ±8.1x10 <sup>6</sup> | 4.1x10 <sup>7</sup> ±8.1x10 <sup>6</sup> |      |

|    |                |                                       |                                       |                                       |                                       |                                       |                                       |
|----|----------------|---------------------------------------|---------------------------------------|---------------------------------------|---------------------------------------|---------------------------------------|---------------------------------------|
| 96 | <i>E. coli</i> | $8.9 \times 10^8 \pm 7.2 \times 10^7$ | $8.5 \times 10^8 \pm 1.5 \times 10^8$ | $6.3 \times 10^8 \pm 7.0 \times 10^7$ | $7.8 \times 10^8 \pm 5.5 \times 10^7$ | $8.6 \times 10^8 \pm 4.0 \times 10^7$ | $9.5 \times 10^8 \pm 5.5 \times 10^7$ |
|    | MF             | $7.8 \times 10^7 \pm 1.3 \times 10^7$ | $1.1 \times 10^8 \pm 1.7 \times 10^7$ | 0                                     | 0                                     | $6.3 \times 10^7 \pm 4.1 \times 10^6$ | $5.6 \times 10^7 \pm 1.2 \times 10^7$ |

---

Reported values are means  $\pm$  standard deviations for 3 replicates. ND, not determined; 39<sup>th</sup> *E. coli*, adapted *E. coli*; 1<sup>st</sup> *E. coli*, non-adapted *E. coli*.

Table S4. pH evaluation and amounts of methane, formate, acetate, and ethanol

(A) pH

| Time (h) | 39 <sup>th</sup> <i>E. coli</i> | 1 <sup>st</sup> <i>E. coli</i> | 39 <sup>th</sup> <i>E. coli</i> | 1 <sup>st</sup> <i>E. coli</i> | 39 <sup>th</sup> <i>E. coli</i> | 1 <sup>st</sup> <i>E. coli</i> |
|----------|---------------------------------|--------------------------------|---------------------------------|--------------------------------|---------------------------------|--------------------------------|
|          | <i>M. formicicum</i>            | <i>M. formicicum</i>           | DMSO                            | DMSO                           | <i>M. formicicum</i>            | <i>M. formicicum</i>           |
|          |                                 |                                |                                 |                                | DMSO                            | DMSO                           |
| 0        | 7.13                            | 7.14                           | 7.14                            | 7.15                           | 7.20                            | 7.17                           |
| 24       | 7.16                            | 7.18                           | 7.07                            | 6.95                           | 7.09                            | 7.03                           |
| 48       | 6.77                            | 7.05                           | 6.59                            | 6.52                           | 6.67                            | 6.77                           |
| 72       | 5.79                            | 6.62                           | 5.91                            | 5.84                           | 5.83                            | 6.35                           |
| 96       | 6.19                            | 6.92                           | 6.10                            | 6.14                           | 5.95                            | 6.84                           |

(B) Formate (mM)

| Time (h) | 39 <sup>th</sup> <i>E. coli</i> | 1 <sup>st</sup> <i>E. coli</i> | 39 <sup>th</sup> <i>E. coli</i> | 1 <sup>st</sup> <i>E. coli</i> | 39 <sup>th</sup> <i>E. coli</i> | 1 <sup>st</sup> <i>E. coli</i> |
|----------|---------------------------------|--------------------------------|---------------------------------|--------------------------------|---------------------------------|--------------------------------|
|          | <i>M. formicicum</i>            | <i>M. formicicum</i>           | DMSO                            | DMSO                           | <i>M. formicicum</i>            | <i>M. formicicum</i>           |



|    |         |         |         |          | DMSO    | DMSO    |
|----|---------|---------|---------|----------|---------|---------|
| 0  | 0       | 0       | 0       | 0        | 0       | 0       |
| 24 | 0       | 1.9±0.7 | 3.7±0.2 | 5.6±0.4  | 0       | 2.8±0.7 |
| 48 | 0       | 0       | 6.8±0.4 | 10.5±1.0 | 0       | 4.2±1.1 |
| 72 | 3.4±0.2 | 0       | 8.0±0.5 | 14.1±1.7 | 1.2±1.1 | 3.0±2.3 |
| 96 | 0       | 0       | 7.6±0.3 | 14.4±1.2 | 0       | 0       |

(C) Acetate (mM)

| Time (h) | 39 <sup>th</sup> <i>E. coli</i> | 1 <sup>st</sup> <i>E. coli</i> | 39 <sup>th</sup> <i>E. coli</i> | 1 <sup>st</sup> <i>E. coli</i> | 39 <sup>th</sup> <i>E. coli</i> | 1 <sup>st</sup> <i>E. coli</i> |
|----------|---------------------------------|--------------------------------|---------------------------------|--------------------------------|---------------------------------|--------------------------------|
|          | <i>M. formicicum</i>            | <i>M. formicicum</i>           | DMSO                            | DMSO                           | <i>M. formicicum</i>            | <i>M. formicicum</i>           |
|          |                                 |                                |                                 |                                | DMSO                            | DMSO                           |
| 0        | 0                               | 0                              | 0                               | 0                              | 0                               | 0                              |
| 24       | 2.1±0.3                         | 1.7±0.2                        | 2.2±0.2                         | 1.9±0.2                        | 2.8±0.1                         | 2.4±0.1                        |
| 48       | 3.6±0.6                         | 2.2±0.3                        | 2.2±0.1                         | 1.5±0.1                        | 4.4±0.2                         | 3.1±0.1                        |

|    |         |         |       |         |         |         |
|----|---------|---------|-------|---------|---------|---------|
| 72 | 5.4±1.3 | 3.5±0.5 | 2.4±0 | 1.3±0.1 | 5.9±0.2 | 3.6±0.9 |
| 96 | 6.1±1.8 | 5.3±0.8 | 2.7±0 | 1.5±0.1 | 7.0±0.4 | 4.6±1.4 |

(D) Ethanol (mM)

| Time (h) | 39 <sup>th</sup> <i>E. coli</i> | 1 <sup>st</sup> <i>E. coli</i> | 39 <sup>th</sup> <i>E. coli</i> | 1 <sup>st</sup> <i>E. coli</i> | 39 <sup>th</sup> <i>E. coli</i> | 1 <sup>st</sup> <i>E. coli</i> |
|----------|---------------------------------|--------------------------------|---------------------------------|--------------------------------|---------------------------------|--------------------------------|
|          | <i>M. formicicum</i>            | <i>M. formicicum</i>           | DMSO                            | DMSO                           | <i>M. formicicum</i>            | <i>M. formicicum</i>           |
|          |                                 |                                |                                 |                                | DMSO                            | DMSO                           |
| 0        | 0                               | 0                              | 0                               | 0                              | 0                               | 0                              |
| 24       | 20.1±2.9                        | 25.3±2.9                       | 14.3±4.7                        | 18.3±5.5                       | 19.0±0.8                        | 21.7±4.3                       |
| 48       | 28.4±4.1                        | 39.2±2.8                       | 18.6±1.5                        | 29.2±1.3                       | 24.3±1.5                        | 37.6±1.3                       |
| 72       | 54.3±2.1                        | 65.3±2.3                       | 26.9±0.2                        | 46.3±1.8                       | 44.6±1.0                        | 63.0±1.9                       |
| 96       | 56.9±3.5                        | 74.8±3.0                       | 30.8±0.1                        | 52.2±1.6                       | 47.3±2.0                        | 67.5±5.7                       |

Reported values are means ± standard deviations for 3 replicates. ND, not determined; 39<sup>th</sup> *E. coli*, adapted *E. coli*; 1<sup>st</sup> *E. coli*, non-adapted *E. coli*.
